# Supplementary material for: In vivo Antitumor Activity of MEK and Phosphatidylinositol 3-Kinase Inhibitors in Basal-Like Breast Cancer Models
Source: Oxford University Press journal article supplement (doi:10.1158/1078-0432.ccr-09-0317), 2009-06-30
Supplement: 10780432ccr090317-sup-supplementary_data.pdf [file 10780432ccr090317-sup-supplementary_data.pdf]

## Supplemental Figure 1: In vitro viability data

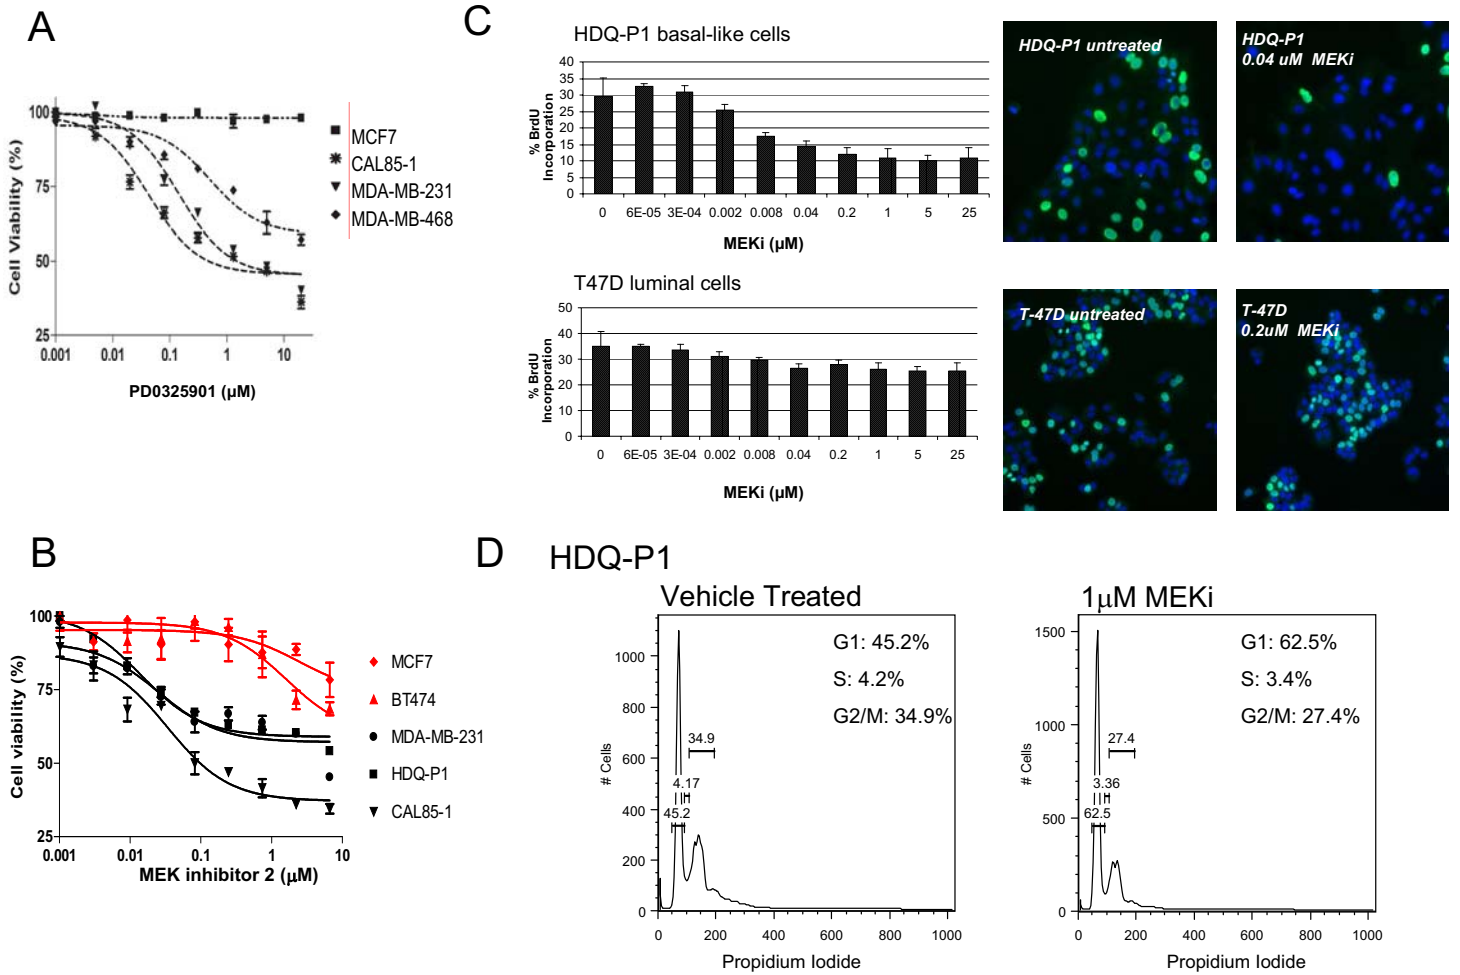

Supplemental Figure 2: PTEN and EGFR in Breast Lines

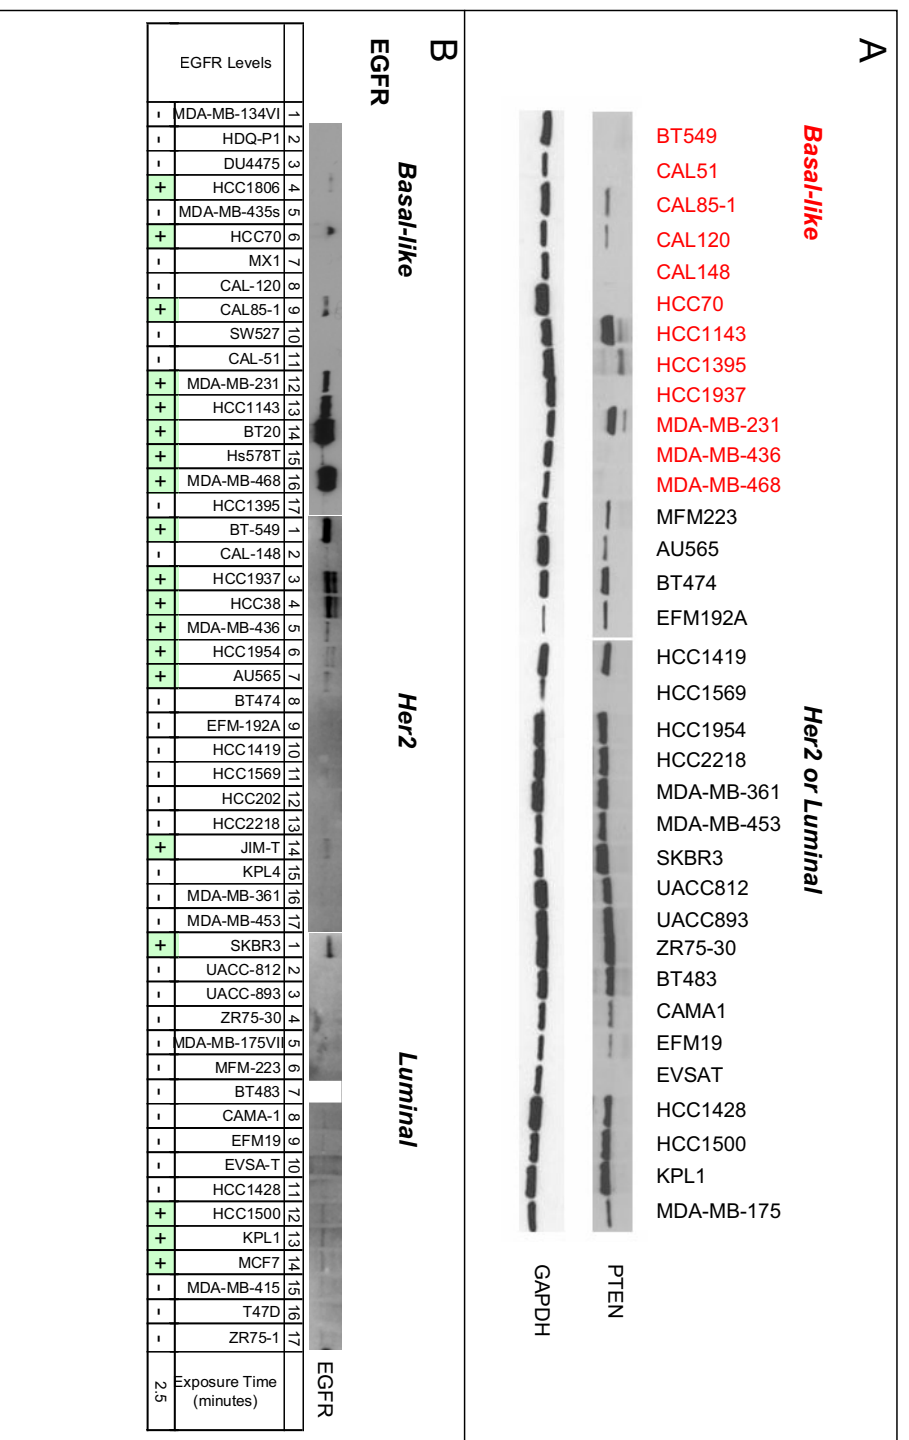

**Supplemental figure 3: Molecular Classification of Breast Tumor Models**

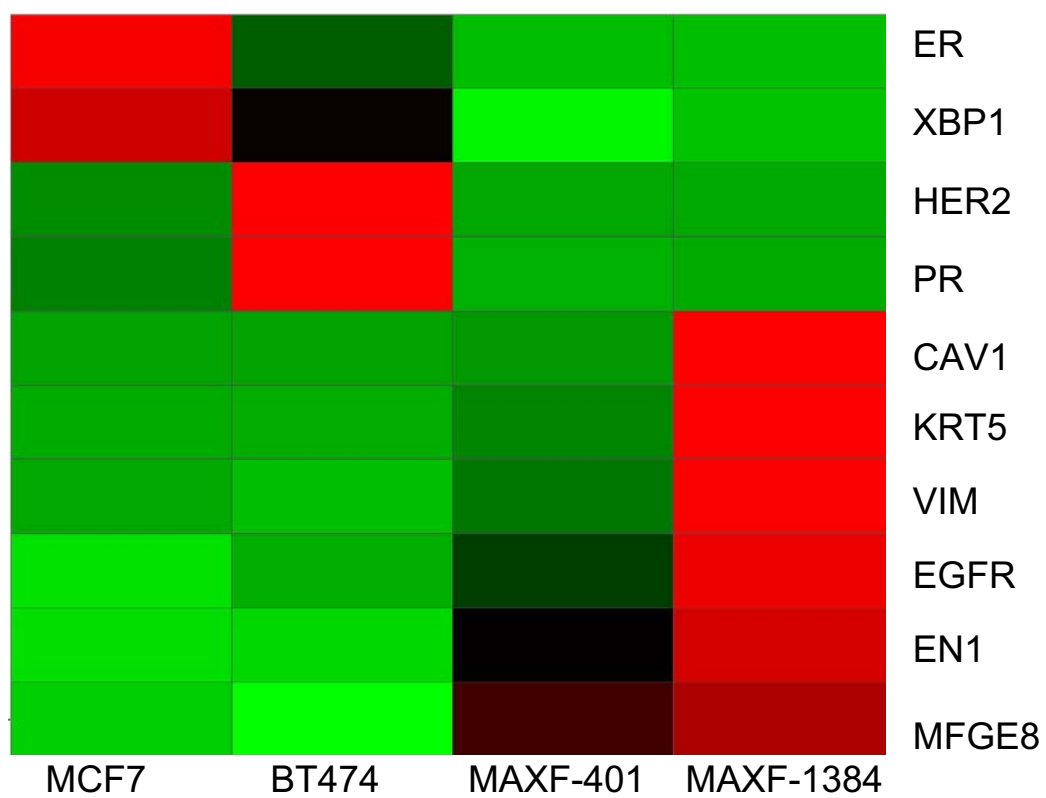

**Supplemental figure 4: Pharmacodynamic response to MEK Inhibition in Xenograft Tumors**

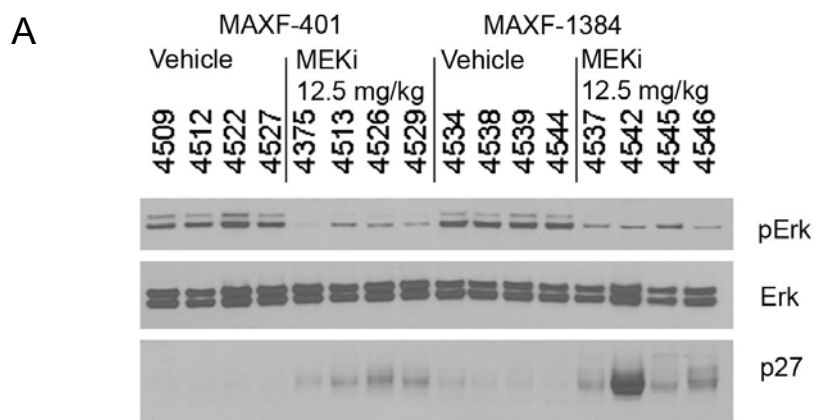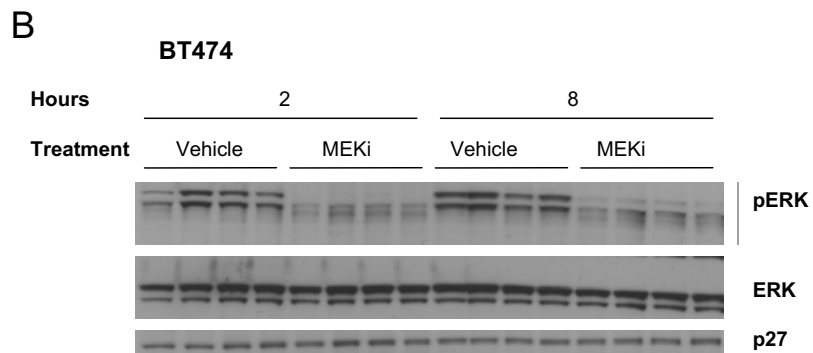

Supplemental Figure 5: 1 $\mu$ M erlotinib treatment downregulates pErk in CAL85-1 but not MDA-MB-231 KRAS mutant cells

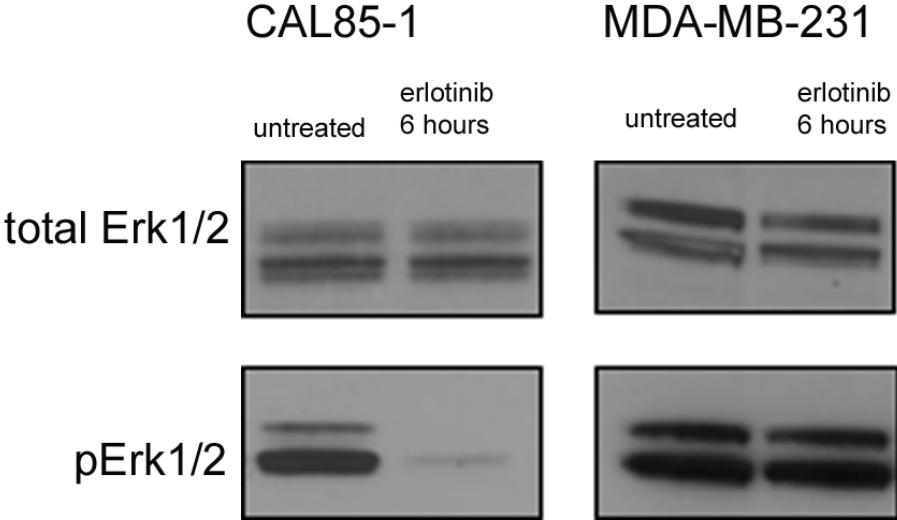

Supplemental figure 6: Quantitation of EGFR and PTEN siRNA Knockdown

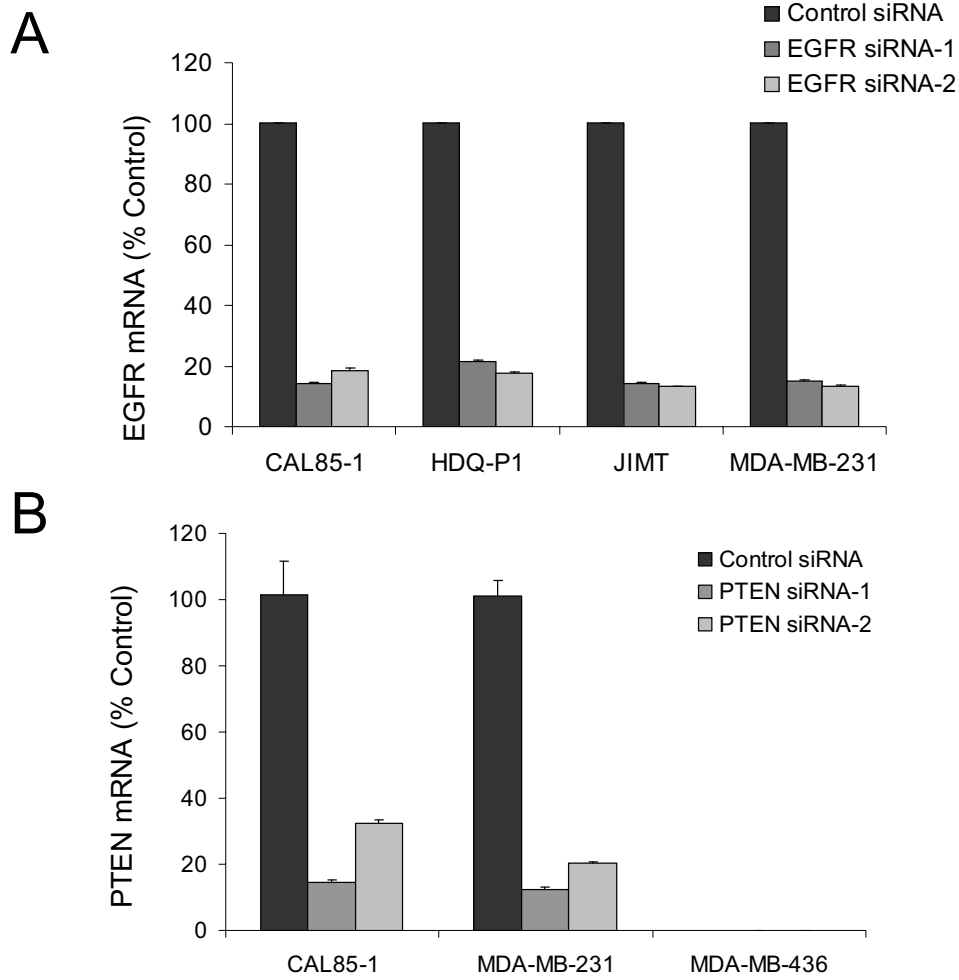

Supplemental figure 7: PTEN siRNA Reduces G1 Arrest in Response to MEK Inhibition

MDA-MB-231

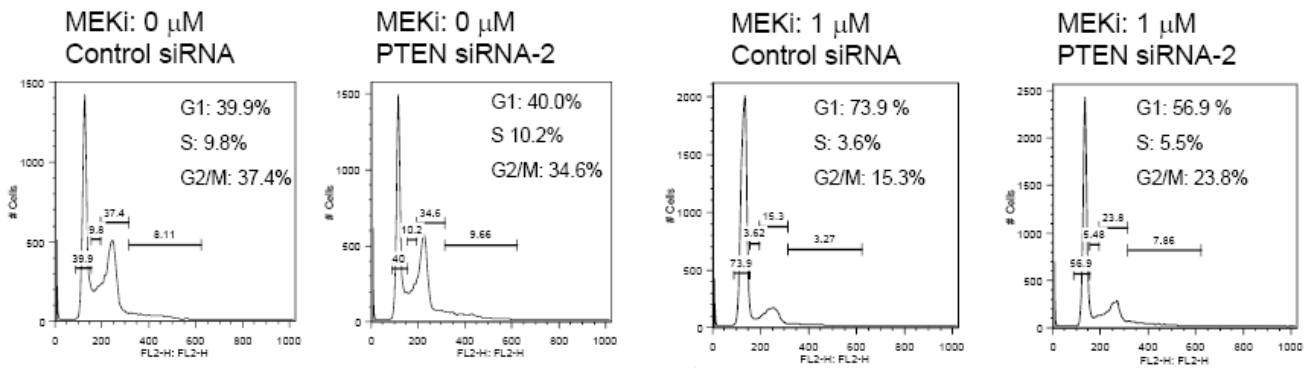

Supplemental figure 8: 1 $\mu$ M MEKi Treatment Increases pAkt(S473) in a Range of Breast Cancer Cell Lines

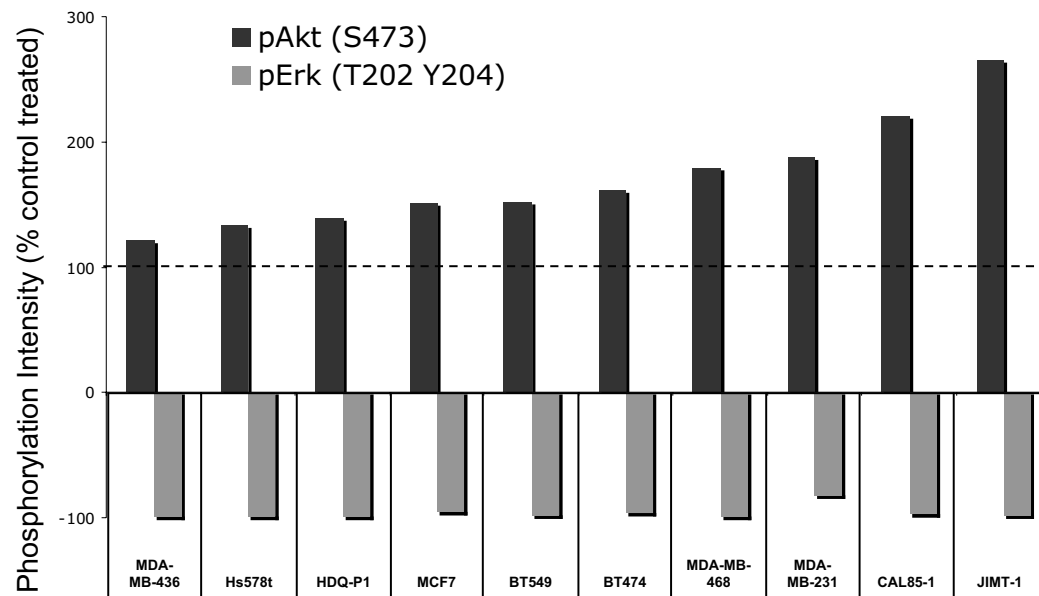



Supplemental figure 9: Cyclin D1 downregulation in response to MEKi, PI3Ki or combination treatment in cell lines that show in vitro synergy (MDA-MB-231 and CAL85-1 data from Figure 5A) or lack of synergy (MCF-7 and JIMT-1). Graphs show quantitation of immunoblot bands using NIH Image J software.

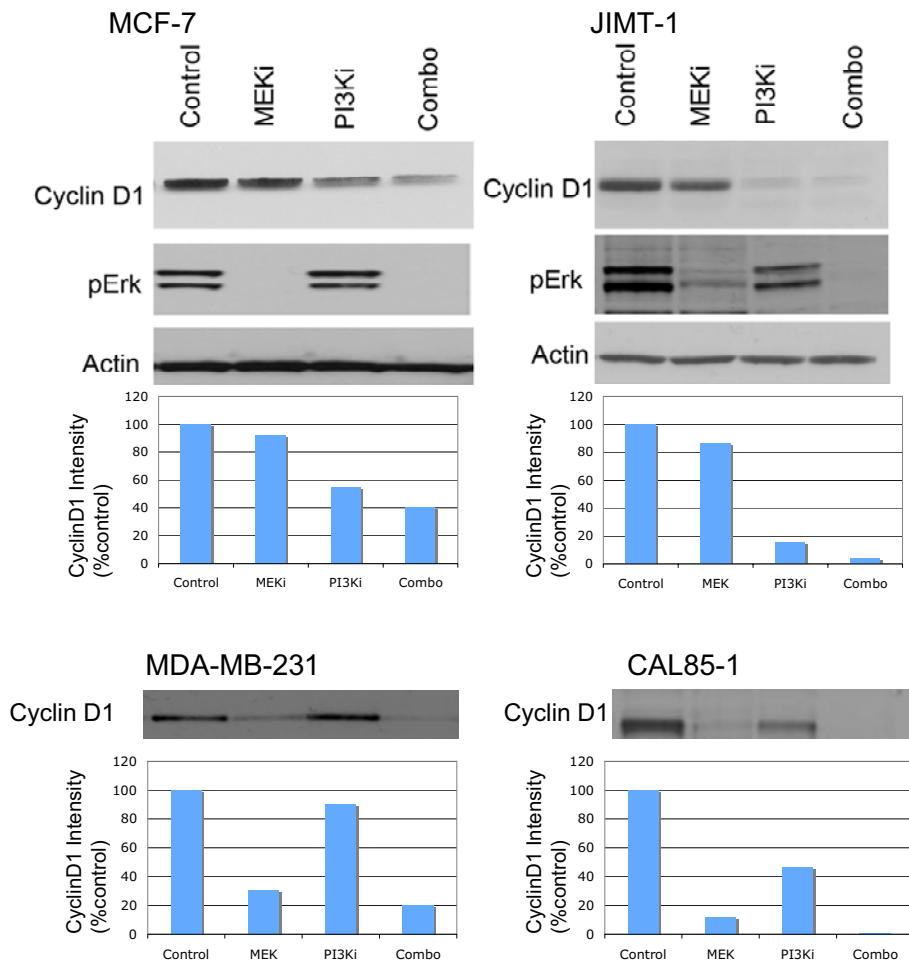

Supplemental figure 10: FACS assay for TUNEL apoptosis marker shows synergistic increases in apoptotic response in basal-like non-BRAF mutant cell lines but not a luminal cell line. Panel A shows raw FACS data from Hs578t cells and panel B quantitation of data for multiple cell lines. Molecular subtypes and key genetic alterations are indicated under the graph.

A

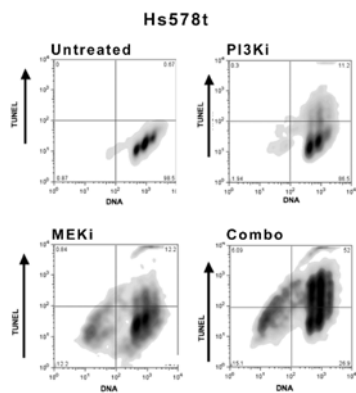

B

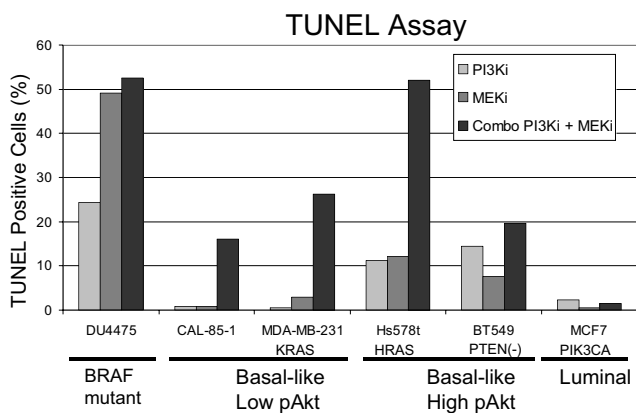

Supplemental figure 11: A MEK and PI3 kinase inhibitor combination regimen is well tolerated in mice harboring MX-1 basal-like PTEN null tumors

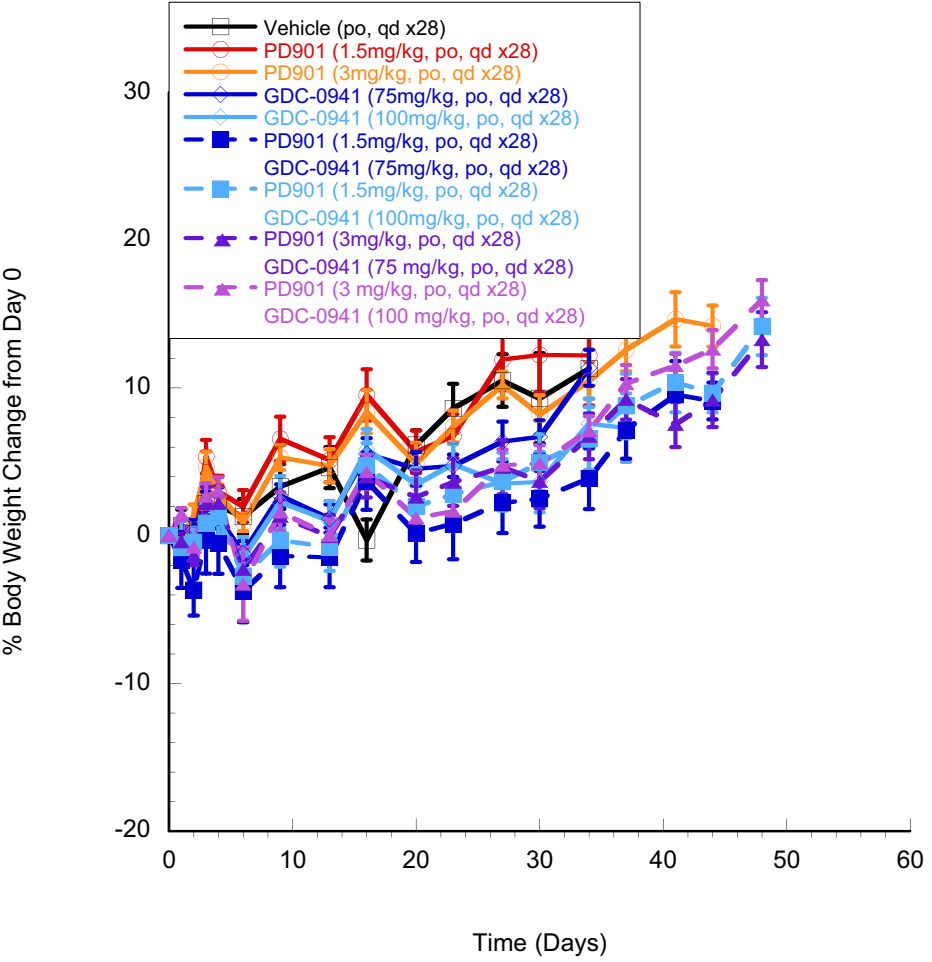

Hoeflich et al Supplemental Materials and Methods:

### **Cell lines**

Breast cancer cell lines AU565, BT-20, BT-474, BT-549, BT-483, CAMA-1, DU4475, HCC1143, HCC1395, HCC1419, HCC1428, HCC1500, HCC1569, HCC1937, HCC1954, HCC2218, HCC38, HCC70, Hs578T, KPL-1, KPL-4, MCF-7, MDA-MB-134-VI, MDA-MB-175-VII, MDA-MB-231, MDA-MB-361, MDA-MB-415, MDA-MB-436, MDA-MB-453, MDA-MB-468, SK-BR-3, SW-527, T-47D, UACC-812, UACC-893, ZR-75-1 and ZR-75-30 were obtained from American Type Culture Collection (ATCC, Manassas, VA). The cell lines CAL-120, CAL-148, CAL-51, CAL-85-1, EFM-19, HDQ-P1, HCC1806, HCC202, EFM-192A, EVSA-T, JIMT-1, and MFM-223 were obtained from the Deutsche Sammlung von Mikroorganismen und Zellkulturen GmbH (DSMZ, Braunschweig, Germany). MX-1 was obtained from the Piedmont Research Center (Wilmington, NC), and BT474M1 is a subclone of BT474 that was obtained from California Pacific Medical Center. All cell lines were maintained in RPMI 1640 or DMEM supplemented with 10% fetal bovine serum (Sigma, St. Louis, MO), non-essential amino acids and 2 mmol/L L-glutamine. The integrity of the cell line panel and confirmation of unique identity all cell lines is of great importance to the conclusions of the study, so we have taken several steps to ensure this integrity. First, all cell lines were newly acquired from the above vendors and characterized and archived at low passage number. As described previously we have profiled the cell lines on Affymetrix 100K mapping SNP arrays (17). SNPs for which no genotype was called in any cell line were excluded. The percentage agreement in genotype at all other SNPs was calculated for each pair of cell lines. The percent agreement values fell clearly into two groups, one around 70% and

one around 99%. Two pairs of cell lines (KPL-1 and MCF-7, AU565 and SKBR3) had percent agreement values above 95% and thus were considered to be of common origin. Otherwise the cell lines used in this study were genetically distinct based on this analysis. In addition, our independent gene expression analyses and classification into molecular subtype for all of the cell lines in the study were compared with the classification described by Neve et al (26) and we found near perfect agreement between the cell lines that overlap between the studies, thus supporting the molecular subtype classification we describe. The one exception is the HCC1500 cell line, which is luminal in our analyses of cells derived from two independent vials ordered from ATCC but is described by Neve et al as basal-like.

### **High Content Assays for Cell Proliferation**

Cells were plated at 5-10K per well (depending on cell line growth properties) in PackardView 96 well plates and allowed to adhere overnight incubating at 37°C. The following day the cells were treated with the MEK inhibitor and allowed to incubate for 72 hours at 37°C. BrdU labeling reagent (Cat.# B9285, Sigma) was then added to the cells at a final concentration of 200nM for an additional 5 hours, and then plates were fixed and processed according using the manufacturer's standard protocol. Cells were counterstained with Hoechst-33258 to allow identification of nuclei and the percentage of cells positive for BrdU immunofluorescence was then quantitated for at least 1000 cells per well using Cellomics Target Activation software ([www.cellomics.com](http://www.cellomics.com)).

### **Chou and Talalay combination index experiments**

For in vitro combination studies CAL85-1, Hs578t, MCF7 and JIMT-1 cells were plated out in 384 well format and compounds were added in a fixed dose ratio ranging from 1/16 to 8X the EC<sub>50</sub> of each drug, both alone and in combination. For the MEK inhibitor the range of concentrations spanned 0.04 $\mu$ M to 20 $\mu$ M and for the PI3 Kinase inhibitor the range of concentrations spanned 0.025 $\mu$ M to 13 $\mu$ M.

### **Protein analyses**

For in vitro pharmacodynamic studies, BT474, HDQ-P1, CAL85-1 and MDA-MB-231 cells were plated in 12 well plates and allowed to grow for until cells reached 60-80% confluence. Cells were dosed with 0, 0.1, or 1.0  $\mu$ M MEK inhibitor and duplicate plates were made for each timepoint. Cells were incubated in the compound for 6 or 24 hours, then washed with cold PBS and processed for Western blotting using standard protocols, as described in the Supplemental Experimental Methods. CAL85-1 cells were cultured in media containing 10 ng/ml EGF to assess pAKT levels since basal levels of pAKT are undetectable in this cell line when cultured in 10% FBS. For analysis of protein expression in tumor xenografts, lysate from tumor samples was collected by adding DNase Lysis Buffer to frozen tissue and pulverized using the TissueLyser (Qiagen, Valencia, CA) as described by the manufacturer.

Primary blotting antibodies used were p27(C-19) (Santa Cruz Biotechnology cat # sc-528), Cyclin D1(DCS-6) (Santa Cruz Biotechnology cat# SC-20044), ERK #9102, pERK (Thr202/Tyr204) (Cell Signaling Technology, cat #9101), Total AKT and pAKT (S473) (Cell Signaling Technology, cat

#9272 and cat #9271). Secondary blotting antibodies used were polyclonal Goat anti-mouse IgG HRP and Polyclonal Goat anti-rabbit IgG HRP (both from Dako, Glostrup, Denmark Cat.# P0161 and P0448, or Cell Signaling Technology Cat. #7076 and #7074).

Quantitative analysis of protein expression using reverse phase protein arrays was performed at Theranostics Health (Rockville, Md) as described previously (Boyd et al., 2008) and in the Supplemental Experimental Procedures.

### **siRNA Experiments**

Transfection efficiency of siRNA was evaluated by qRT-PCR. Optimal siRNA duplex and lipid concentrations were determined for each cell-line. For the adherent cell lines CAL85-1, HDQ-P1, MDA-MB-231 or MDA-MB-436, cells were plated at 6000 cells per well in a 96 well plate with 0.125uL of Lipofectamine RNAiMAX (Cat.#13778-150 Invitrogen, Carlsbad, CA) and 50nM of siRNA per well. Cells were incubated for 3 days in siRNA then the MEK inhibitor was added for 24 hours, followed by addition of CellTiter Glo or processing for Cell Cycle Profiling. For quantitation of siRNA knockdown by PTEN or EGFR duplexes, RNA was collected and isolated using the QIAGEN TurboCapture mRNA Kit (Cat.#72251). cDNA was made using the High Capacity cDNA Reverse Transcription Kit (Cat.#4368813) from ABI and qPCR was done using assays on demand from ABI. EGFR(cat.#Hs00193306\_m1) and PTEN (cat.#Hs02621230\_s1) primer/probe sets were normalized to the average of the housekeeping genes PPIA (cat.#Hs99999904\_m1) and UBC (cat.#Hs00824723\_m1) and then again to the corresponding NTC siRNA for

each cell line using the  $\Delta\Delta\text{CT}$  method.

### **Gene Expression Microarray Analyses**

For supervised analysis of breast cancer cell lines, gene expression data were filtered to remove probe sets that showed little variation across the cell lines. Briefly, probes that did not show at least a five fold variation across the samples ( $\text{max}/\text{min} > 10$ ) and an absolute intensity difference of at least 250 ( $\text{max} - \text{min} > 250$ ) were excluded from hierarchical clustering analysis. Cell lines were binned into sensitive and resistant classes based on an  $\text{EC}_{50}$  cutoff of  $1\mu\text{M}$  and the Cyber-T algorithm was implemented to identify genes differentially expressed between the classes. Data preprocessing prior to clustering analysis involved log transforming and median centering gene expression values, after which average linkage clustering was carried out using Spotfire software ([www.spotfire.com](http://www.spotfire.com)).

### **Identification of Activated RAS and MEK signatures**

Stocks of recombinant adenoviruses expressing GFP, HRAS (G12V), and MEK1 (S217E S221E) transgenes (henceforth referred to as gain of function constructs, gf) as well as null control vectors, were purchased and propagated in HEK 293 cells according to vendor supplied protocol (Cell BioLabs, San Diego, CA). Viral vectors were isolated and functionally titered using assay kits (Cell BioLabs, San Diego, CA). Optimal multiplicity of infection (MOI) was determined for MCF10A cells by GFP transfection. Cells were then optimally transfected with MEK1, HRAS, and null control vectors. Cells were lysed 24 hours post-transfection with collection of total RNA and protein via a kit (Qiagen, Valencia, CA). Expression upon transfection for MEK1(gf) and HRas(gf) was confirmed by western blot



(data not shown). Isolated RNA was reversed transcribed to cDNA and then run on Human Genome U133P 2.0 Array chips (Affymetrix, Santa Clara, CA). At least five independent replicates were profiled for each expression construct. Differentially expressed genes between cells infected with control vector and MEK(gf) or RAS(gf) vectors were identified by via the Cyber-T algorithm (Baldi and Long, 2001). We developed pathway activation signatures using a variation of the strategy employed by Bild et al (Bild et al., 2006). The positive training data comprised five HRAS and six MEK1 samples, and the negative training data comprised eighteen control samples. The use of test set data when defining metagenes has been shown to improve predictor performance, but has been controversial (Coombes et al., 2007; Potti and Nevins, 2007). We devised an alternative approach to ensure the use of metagenes that would generalize beyond the training set without using test set data. This approach used a large corpus of unrelated microarray data which reflects real and diverse patterns of gene expression. Specifically, microarray data for 9,833 normal tissue samples with HGU133 Plus 2.0 expression data were collected from Gene Logic, Genentech and the Gene Expression Omnibus (GEO) and expression values for each probe were centered about their median. The singular value decomposition of this collection of normal tissue expression data was calculated and the resulting eigenarray matrix was used as a basis for transformation of the training data. The transformed features of the training data were then ordered according to their difference across training set classes by the Rank Product procedure (Breitling et al., 2004). L2 penalized logistic regression models were trained using iteratively re-weighted ridge regression (Park and Hastie, 2008) on the reduced singular value decomposition (West, 2003) of the top N features. The top N features which minimized cross validation error were used to train

the final model. Predicted pathway activation levels derived from the model for each cell line are shown in Supplemental table 1.

Supplemental table 1: Top 100 genes in sensitive vs resistant cell lines

| ProbeID      | UNG      | UNG Short Name | HUGO Symbol | SRCNAME                                                                                                                                          |
|--------------|----------|----------------|-------------|--------------------------------------------------------------------------------------------------------------------------------------------------|
| 227919_at    | UNG28863 | YHRL28863      | NA          | NA                                                                                                                                               |
| 205428_s_at  | UNG9956  | CALB2          | CALB2       | calbindin 2, 29kDa (calretinin)                                                                                                                  |
| 227458_at    | UNG6713  | PDL1/B7-H1     | CD274       | CD274 molecule                                                                                                                                   |
| 226140_s_at  | UNG16971 | OTUD1          | OTUD1       | OTU domain containing 1                                                                                                                          |
| 201042_at    | UNG7380  | TGM2           | TGM2        | transglutaminase 2 (C polypeptide, protein-glutamine-gamma-glutamyltransferase)                                                                  |
| 235911_at    | NA       | NA             | NA          | NA                                                                                                                                               |
| 205032_at    | UNG1682  | ITGA2          | ITGA2       | integrin, alpha 2 (CD49B, alpha 2 subunit of VLA-2 receptor)                                                                                     |
| 226757_at    | UNG21425 | IFIT2          | IFIT2       | interferon-induced protein with tetratricopeptide repeats 2                                                                                      |
| 223961_s_at  | UNG5695  | CISH           | CISH        | cytokine inducible SH2-containing protein                                                                                                        |
| 227475_at    | UNG24348 | FOXQ1          | FOXQ1       | forkhead box Q1                                                                                                                                  |
| 215543_s_at  | UNG10018 | LARGE          | LARGE       | like-glycosyltransferase                                                                                                                         |
| 204363_at    | UNG11    | TF             | F3          | coagulation factor III (thromboplastin, tissue factor)                                                                                           |
| 209343_at    | UNG20640 | EFHD1          | EFHD1       | EF-hand domain family, member D1                                                                                                                 |
| 208250_s_at  | UNG5963  | DMBT1          | NA          | NA                                                                                                                                               |
| 214434_at    | UNG14471 | HSPA12A        | HSPA12A     | heat shock 70kDa protein 12A                                                                                                                     |
| 203638_s_at  | UNG942   | FGFR2          | FGFR2       | fibroblast growth factor receptor 2 (bacteria-expressed kinase, keratinocyte growth factor receptor, craniofacial dysostosis 1, Crouzon syndrom) |
| 209011_at    | UNG1870  | TRIO           | TRIO        | triple functional domain (PTPRF interacting)                                                                                                     |
| 203896_s_at  | UNG3146  | PLCB4          | PLCB4       | phospholipase C, beta 4                                                                                                                          |
| 209270_at    | UNG1262  | LAMB3          | LAMB3       | laminin, beta 3                                                                                                                                  |
| 227314_at    | UNG1682  | ITGA2          | ITGA2       | integrin, alpha 2 (CD49B, alpha 2 subunit of VLA-2 receptor)                                                                                     |
| 1555742_at   | NA       | NA             | NA          | NA                                                                                                                                               |
| 204508_s_at  | UNG13558 | CA12           | CA12        | carbonic anhydrase XII                                                                                                                           |
| 201566_x_at  | UNG3216  | ID2            | ID2         | inhibitor of DNA binding 2, dominant negative helix-loop-helix protein                                                                           |
| 229450_at    | UNG13624 | IFIT3          | IFIT3       | interferon-induced protein with tetratricopeptide repeats 3                                                                                      |
| 213524_s_at  | UNG4406  | GOS2           | GOS2        | G0/G1 switch 2                                                                                                                                   |
| 204039_at    | UNG8046  | mc/EPB         | NA          | NA                                                                                                                                               |
| 203963_at    | UNG13558 | CA12           | CA12        | carbonic anhydrase XII                                                                                                                           |
| 225847_at    | UNG11715 | AADACL1        | AADACL1     | arylacetamide deacetylase-like 1                                                                                                                 |
| 218086_at    | UNG7114  | NPDC1          | NPDC1       | neural proliferation, differentiation and control, 1                                                                                             |
| 201565_s_at  | UNG3216  | ID2            | ID2         | inhibitor of DNA binding 2, dominant negative helix-loop-helix protein                                                                           |
| 212148_at    | UNG4995  | PBX1           | PBX1        | pre-B-cell leukemia homeobox 1                                                                                                                   |
| 214164_x_at  | UNG13558 | CA12           | CA12        | carbonic anhydrase XII                                                                                                                           |
| 217502_at    | UNG21425 | IFIT2          | IFIT2       | interferon-induced protein with tetratricopeptide repeats 2                                                                                      |
| 204747_at    | UNG13624 | IFIT3          | IFIT3       | interferon-induced protein with tetratricopeptide repeats 3                                                                                      |
| 201095_at    | NA       | NA             | NA          | NA                                                                                                                                               |
| 200672_x_at  | UNG7408  | SPTBN1         | SPTBN1      | spectrin, beta, non-erythrocytic 1                                                                                                               |
| 218806_s_at  | UNG14258 | VAV3           | VAV3        | vav 3 oncogene                                                                                                                                   |
| 218796_at    | UNG20949 | C20orf42       | C20orf42    | chromosome 20 open reading frame 42                                                                                                              |
| 235457_at    | UNG12517 | MAML2          | NA          | NA                                                                                                                                               |
| 201995_at    | UNG5295  | EXT1           | EXT1        | exostoses (multiple) 1                                                                                                                           |
| 210457_x_at  | UNG5772  | HMG1           | HMG1        | high mobility group AT-hook 1                                                                                                                    |
| 223112_s_at  | UNG14082 | NDUFB10        | NDUFB10     | NADH dehydrogenase (ubiquinone) 1 beta subcomplex, 10, 22kDa                                                                                     |
| 226333_at    | UNG923   | IL6R           | IL6R        | interleukin 6 receptor                                                                                                                           |
| 60474_at     | UNG20949 | C20orf42       | C20orf42    | chromosome 20 open reading frame 42                                                                                                              |
| 208074_s_at  | UNG5772  | HMG1           | HMG1        | high mobility group AT-hook 1                                                                                                                    |
| 218856_at    | UNG437   | TNFRSF21       | TNFRSF21    | tumor necrosis factor receptor superfamily, member 21                                                                                            |
| 224909_s_at  | UNG16674 | EAPS16674      | NA          | NA                                                                                                                                               |
| 209369_at    | UNG14083 | ANXA3          | ANXA3       | annexin A3                                                                                                                                       |
| 227342_s_at  | UNG25939 | MYEOV          | MYEOV       | myeloma overexpressed gene (in a subset of t(11;14) positive multiple myelomas)                                                                  |
| 215867_x_at  | UNG13558 | CA12           | CA12        | carbonic anhydrase XII                                                                                                                           |
| 212770_at    | UNG4601  | TLE4           | TLE4        | transducin-like enhancer of split 3 (E(sp1) homolog, Drosophila)                                                                                 |
| 226487_at    | UNG20292 | FLJ14721       | C12orf34    | chromosome 12 open reading frame 34                                                                                                              |
| 214581_x_at  | UNG437   | TNFRSF21       | TNFRSF21    | tumor necrosis factor receptor superfamily, member 21                                                                                            |
| 204268_at    | UNG4926  | S100A2         | S100A2      | S100 calcium binding protein A2                                                                                                                  |
| 230183_at    | UNG5295  | EXT1           | EXT1        | exostoses (multiple) 1                                                                                                                           |
| 210692_s_at  | UNG32943 | SLC43A3        | SLC43A3     | solute carrier family 43, member 3                                                                                                               |
| 1553530_a_at | UNG1687  | ITGB1          | ITGB1       | integrin, beta 1 (fibronectin receptor, beta polypeptide, antigen CD29 includes MDF2, MSK12)                                                     |
| 235106_at    | UNG34598 | DHX37          | NA          | NA                                                                                                                                               |
| 213113_s_at  | UNG32943 | SLC43A3        | SLC43A3     | solute carrier family 43, member 3                                                                                                               |
| 217997_at    | UNG7723  | PHLDA1         | PHLDA1      | pleckstrin homology-like domain, family A, member 1                                                                                              |
| 201889_at    | UNG4407  | FAM3C          | FAM3C       | family with sequence similarity 3, member C                                                                                                      |
| 213198_at    | UNG917   | ACVR1B         | ACVR1B      | activin A receptor, type IB                                                                                                                      |
| 210433_at    | UNG18623 | BCOR           | BCOR        | BCL6 co-repressor                                                                                                                                |
| 227603_s_at  | UNG16509 | DNND16509      | STAMBPL1    | STAM binding protein-like 1                                                                                                                      |
| 209946_at    | UNG417   | VEGFC          | VEGFC       | vascular endothelial growth factor C                                                                                                             |
| 224025_at    | UNG16674 | EAPS16674      | NA          | NA                                                                                                                                               |
| 212631_at    | UNG1721  | LCN2           | LCN2        | lipocalin 2 (incognine 24p3)                                                                                                                     |
| 1553858_at   | UNG11983 | ZBTB3          | ZBTB3       | zinc finger and BTB domain containing 3                                                                                                          |
| 212151_at    | UNG4995  | PBX1           | PBX1        | pre-B-cell leukemia homeobox 1                                                                                                                   |
| 231035_s_at  | NA       | NA             | NA          | NA                                                                                                                                               |
| 212071_s_at  | UNG7408  | SPTBN1         | SPTBN1      | spectrin, beta, non-erythrocytic 1                                                                                                               |
| 228340_at    | UNG4601  | TLE4           | TLE4        | transducin-like enhancer of split 3 (E(sp1) homolog, Drosophila)                                                                                 |
| 227272_at    | UNG26769 | LOC374614      | NA          | NA                                                                                                                                               |
| 218000_s_at  | UNG7723  | PHLDA1         | PHLDA1      | pleckstrin homology-like domain, family A, member 1                                                                                              |
| 225688_s_at  | UNG20005 | PLCXB2         | PHLDB2      | pleckstrin homology-like domain, family B, member 2                                                                                              |
| 205660_at    | UNG17129 | OASL           | OASL        | 2'-5'-oligoadenylate synthetase-like                                                                                                             |
| 223194_s_at  | UNG11816 | C6orf85        | C6orf85     | chromosome 6 open reading frame 85                                                                                                               |
| 221223_x_at  | UNG5695  | CISH           | CISH        | cytokine inducible SH2-containing protein                                                                                                        |
| 223082_at    | UNG16865 | SH3KBP1        | SH3KBP1     | SH3-domain kinase binding protein 1                                                                                                              |
| 1553678_a_at | UNG1687  | ITGB1          | ITGB1       | integrin, beta 1 (fibronectin receptor, beta polypeptide, antigen CD29 includes MDF2, MSK12)                                                     |
| 208228_s_at  | UNG942   | FGFR2          | FGFR2       | fibroblast growth factor receptor 2 (bacteria-expressed kinase, keratinocyte growth factor receptor, craniofacial dysostosis 1, Crouzon syndrom) |
| 223601_at    | UNG20862 | OLF2           | OLF2        | olfactomedin 2                                                                                                                                   |
| 209530_at    | UNG2071  | CACNB3         | CACNB3      | calcium channel, voltage-dependent, beta 3 subunit                                                                                               |
| 219014_at    | UNG4513  | PLAC8          | PLAC8       | placenta-specific 8                                                                                                                              |
| 205490_x_at  | NA       | NA             | NA          | NA                                                                                                                                               |
| 211599_x_at  | UNG42    | cMet           | MET         | met proto-oncogene (hepatocyte growth factor receptor)                                                                                           |
| 203108_at    | UNG5187  | GPRC5A         | GPRC5A      | G protein-coupled receptor, family C, group 5, member A                                                                                          |
| 213363_x_at  | UNG14562 | PPPIA3         | PPPIA3      | protein tyrosine phosphatase, receptor type, I polypeptide (PTPRF), interacting protein (liprin), alpha 3                                        |
| 227558_at    | UNG10567 | CBX4           | CBX4        | chromobox homolog 4 (Pc class homolog, Drosophila)                                                                                               |
| 209626_s_at  | UNG14055 | OSBPL3         | OSBPL3      | oxysterol binding protein-like 3                                                                                                                 |
| 223484_at    | UNG8528  | NMES1          | C15orf48    | chromosome 15 open reading frame 48                                                                                                              |
| 1554097_a_at | NA       | NA             | NA          | NA                                                                                                                                               |
| 217999_s_at  | UNG7723  | PHLDA1         | PHLDA1      | pleckstrin homology-like domain, family A, member 1                                                                                              |
| 212143_s_at  | UNG119   | IGFBP3         | IGFBP3      | insulin-like growth factor binding protein 3                                                                                                     |
| 221870_at    | UNG20884 | EHD2           | EHD2        | EH-domain containing 2                                                                                                                           |
| 209012_at    | UNG1870  | TRIO           | TRIO        | triple functional domain (PTPRF interacting)                                                                                                     |
| 223301_s_at  | UNG17407 | FLJ23518       | CCDC82      | coiled-coil domain containing 82                                                                                                                 |
| 223566_s_at  | UNG16823 | BCOR           | BCOR        | BCL6 co-repressor                                                                                                                                |
| 204011_at    | UNG5147  | SPRY2          | SPRY2       | sprouty homolog 2 (Drosophila)                                                                                                                   |
| 224583_at    | UNG16648 | COTL1          | COTL1       | coactosin-like 1 (Dictyostelium)                                                                                                                 |

Supplemental table 2: GSEA analysis

| p-value  | Direction | Number of genes | Gene set Name                                                                                                         | Source                                    |
|----------|-----------|-----------------|-----------------------------------------------------------------------------------------------------------------------|-------------------------------------------|
| 1.86E-48 | L         | 465             | Breast cancer ER_POS Genes whose expression is consistently positively correlated with estrogen receptor              | Broad/MIT MSigDB                          |
| 2.54E-45 | U         | 923             | ras-induced senescent IMR90 fibroblast genes Gene expression changes in ras-induced senescent IMR90                   | Mason et al., Oncogene 23:9238-9246; 2004 |
| 1.22E-30 | U         | 314             | BREAST CANCER STROMA GENES genes expressed by stroma of GeneLogic human breast cancer samples                         | Gene logic corporation, Gaithersburg, Md  |
| 6.39E-14 | U         | 210             | BAF57_BT549 UP Up-regulated following stable re-expression of BAF57 in BT549 breast cancer cells that lack functional | Broad/MIT MSigDB                          |
| 4.44E-12 | U         | 123             | HCC SURVIVAL GOOD VS POOR DN Genes highly expressed in hepatocellular carcinoma with poor survival                    | Broad/MIT MSigDB                          |
| 2.53E-09 | U         | 124             | SERUM FIBROBLAST CELL CYCLE Cell-cycle dependent genes regulated following exposure to serum in a variety of          | Broad/MIT MSigDB                          |
| 2.55E-09 | L         | 50              | AGUIRRE_PANCREAS CHR12 Genes on chromosome 1 with copy-number-driven expression in pancreatic adenocarcinoma          | Broad/MIT MSigDB                          |
| 5.83E-09 | U         | 136             | CHANG_SERUM RESPONSE UP CSR (Serum Response) signature for activated genes (Stanford)                                 | Broad/MIT MSigDB                          |
| 8.45E-09 | U         | 46              | TGFBETA_EARLY UP Upregulated by TGF-beta treatment of skin fibroblasts at 30 min (clusters 1-3)                       | Broad/MIT MSigDB                          |
| 1.68E-08 | U         | 80              | CORDERO_KRAS KD_VS_CONTROL UP Genes upregulated in kras knockdown vs control in a human cell line                     | Broad/MIT MSigDB                          |

Supplemental table 3: Top 50 genes induced by MEK and RAS

| ProbeID    | t-statistic | pvalue | qvalue | log2(Fold Change) | UNQ      | UNQ_Short | HUGO Symbol    | Description                                                                                                    |
|------------|-------------|--------|--------|-------------------|----------|-----------|----------------|----------------------------------------------------------------------------------------------------------------|
| 209283_at  | -13.469     | 0      | 0      | -1.472            | UNQ2653  | CRYAB     | CRYAB          | crystallin, alpha B                                                                                            |
| 228955_at  | 9.83        | 0      | 0      | 1.242             | UNQ2146  | LRP8      | LRP8           | low density lipoprotein receptor-related protein 8, apolipoprotein e receptor                                  |
| 218856_at  | -9.526      | 0      | 0      | -1.405            | UNQ437   | TNFRSF21  | TNFRSF21       | tumor necrosis factor receptor superfamily, member 21                                                          |
| 213134_s_x | 11.135      | 0      | 0      | 0.75              | UNQ21946 | BTG3      | BTG3           | BTG family, member 3                                                                                           |
| 219271_at  | 10.566      | 0      | 0      | 3.048             | UNQ2434  | GALNT14   | CAPN14/GALNT14 | calpain 14/UJD-P-N-acetyl-alpha-D-galactosamine:polypeptide N-acetylglucosaminyltransferase 14 (GalNAc-T14)    |
| 206114_at  | -9.343      | 0      | 0      | -3.011            | UNQ369   | EPHA4     | EPHA4          | EPH receptor A4                                                                                                |
| 202309_at  | 9.541       | 0      | 0      | 0.881             | UNQ3256  | MTHFD1    | MTHFD1         | methylene tetrahydrofolate dehydrogenase (NADP+ dependent) 1, methylenetetrahydrofolate cyclohydrolase, formyl |
| 225520_at  | 11.123      | 0      | 0      | 1.097             | UNQ16577 | MTHFD1L   | MTHFD1L        | methylene tetrahydrofolate dehydrogenase (NADP+ dependent) 1-like                                              |
| 201761_at  | 13.105      | 0      | 0      | 0.999             | UNQ7842  | MTHFD2    | MTHFD2         | methylene tetrahydrofolate dehydrogenase (NADP+ dependent) 2, methylenetetrahydrofolate cyclohydrolase         |
| 230266_at  | -10.745     | 0      | 0      | -1.764            | UNQ32692 | RAB7B     | RAB7B          | RAB7B, member RAS oncogene family                                                                              |
| 212190_at  | 10.41       | 0      | 0      | 1.687             | UNQ1485  | SERPINE2  | SERPINE2       | serpin peptidase inhibitor, clade E (nexin, plasminogen activator inhibitor type 1), member 2                  |
| 209406_at  | 9.359       | 0      | 0      | 1.052             | UNQ17175 | BAG2      | BAG2           | BCL2-associated athanogene 2                                                                                   |
| 200952_s_x | -11.504     | 0      | 0      | -3.501            | UNQ2066  | CNND2     | CNND2          | cyclin D2                                                                                                      |
| 218585_s_x | 13.113      | 0      | 0      | 1.22              | UNQ14868 | DTL       | DTL            | denticleless homolog (Drosophila)                                                                              |
| 209800_at  | -9.668      | 0      | 0      | -1.546            | UNQ2246C | KRT16     | KRT16          | keratin 16 (focal non-epidermolytic palmoplantar keratoderma)                                                  |
| 205569_at  | 10.632      | 0      | 0      | 3.735             | UNQ12057 | LAMP3     | LAMP3          | lysosomal-associated membrane protein 3                                                                        |
| 210959_s_x | -9.885      | 0      | 0      | -0.989            | UNQ5731  | SRD5A1    | SRD5A1         | steroid-5-alpha-reductase, alpha polypeptide 1 (3-oxo-5-alpha-steroid delta 4-dehydrogenase alpha 1)           |
| 205542_at  | 9.959       | 0      | 0      | 2.085             | UNQ9109  | STEAP1    | STEAP1         | six transmembrane epithelial antigen of the prostate 1                                                         |
| 223229_at  | 13.004      | 0      | 0      | 1.304             | UNQ10662 | UBE2T     | UBE2T          | ubiquitin-conjugating enzyme E2T (putative)                                                                    |
| 205393_s_x | 10.346      | 0      | 0      | 1.109             | UNQ5011  | CHEK1     | CHEK1          | CHK1 checkpoint homolog (S.pombe)                                                                              |
| 201710_at  | 14.6        | 0      | 0      | 2.559             | UNQ2311  | MYBL2     | MYBL2          | v-myb myeloblastosis viral oncogene homolog (avian)-like 2                                                     |
| 219493_at  | 11.655      | 0      | 0      | 1.041             | UNQ1715C | SHCBP1    | SHCBP1         | SHC SH2-domain binding protein 1                                                                               |
| 202589_at  | 11.505      | 0      | 0      | 1.196             | UNQ9766  | TYMS      | TYMS           | thymidylate synthetase                                                                                         |
| 204126_s_x | 16.226      | 0      | 0      | 4.495             | UNQ374   | CDC45L    | CDC45L         | CDC45 cell division cycle 45-like (S.cerevisiae)                                                               |
| 224753_at  | 10.338      | 0      | 0      | 1.597             | UNQ1660C | CDC45     | CDC45          | cell division cycle associated 5                                                                               |
| 224428_s_x | 20.514      | 0      | 0      | 1.723             | UNQ1259C | CDC47     | CDC47          | cell division cycle associated 7                                                                               |
| 201710_at  | 14.6        | 0      | 0      | 2.559             | UNQ2311  | MYBL2     | MYBL2          | v-myb myeloblastosis viral oncogene homolog (avian)-like 2                                                     |
| 205047_s_x | 10.67       | 0      | 0      | 2.093             | UNQ3246  | ASNS      | ASNS           | asparagine synthetase                                                                                          |
| 205034_at  | 24.867      | 0      | 0      | 2.722             | UNQ10482 | CONE2     | CONE2          | cyclin E2                                                                                                      |
| 224428_s_x | 20.514      | 0      | 0      | 1.723             | UNQ1259C | CDC47     | CDC47          | cell division cycle associated 7                                                                               |
| 225081_s_x | 9.781       | 0      | 0      | 0.78              | UNQ2068C | CDC47L    | CDC47L         | cell division cycle associated 7-like                                                                          |
| 218741_at  | 10.134      | 0      | 0      | 1.772             | UNQ9633  | C22orf18  | CENPM          | centromere protein M                                                                                           |
| 213008_at  | 9.988       | 0      | 0      | 1.641             | UNQ11516 | FKBP1151  | FANCI          | Fanconi anemia, complementation group I                                                                        |
| 218350_s_x | 12.735      | 0      | 0      | 0.882             | UNQ9997  | GMINN     | GMINN          | geminin, DNA replication inhibitor                                                                             |
| 227211_at  | 9.655       | 0      | 0      | 1.022             | UNQ11148 | PHF19     | PHF19          | PHD finger protein 19                                                                                          |
| 219494_at  | 9.775       | 0      | 0      | 1.38              | UNQ1639E | RAD54B    | RAD54B         | RAD54 homolog B (S.cerevisiae)                                                                                 |
| 203968_s_x | 14.117      | 0      | 0      | 1.779             | UNQ1454C | CDC6      | CDC6           | cell division cycle 6 homolog (S.cerevisiae)                                                                   |
| 202411_at  | 9.446       | 0      | 0      | 3.95              | UNQ5393  | IFI27     | IFI27/FAM14A   | interferon, alpha-inducible protein 27/family with sequence similarity 14, member A                            |
| 204734_at  | -9.46       | 0      | 0      | -2.46             | UNQ7983  | KRT19     | KRT15/KRT19    | keratin 15/keratin 19                                                                                          |
| 213906_at  | 16.874      | 0      | 0      | 1.787             | UNQ5673  | MYBL1     | MYBL1          | v-myb myeloblastosis viral oncogene homolog (avian)-like 1                                                     |
| 230356_at  | 13.106      | 0      | 0      | 1.643             | UNQ10354 | Sax1L     | NKX1-2         | NK1 homeobox 2                                                                                                 |
| 218644_at  | 9.993       | 0      | 0      | 1.702             | UNQ2078E | PLEK2     | PLEK2          | pleckstrin 2                                                                                                   |
| 204285_s_x | 13.816      | 0      | 0      | 1.253             | UNQ1498E | PMAIP1    | PMAIP1         | phorbol-12-myristate-13-acetate-induced protein 1                                                              |
| 217272_s_x | -9.096      | 0      | 0      | -2.241            | UNQ12083 | SERPINB1  | SERPINB13      | serpin peptidase inhibitor, clade B (ovalbumin), member 13                                                     |
| 231856_at  | 12.945      | 0      | 0      | 4.543             | UNQ12147 | SPQR1214  | KIAA1244       | KIAA1244                                                                                                       |
| 204798_at  | 9.311       | 0      | 0      | 2.027             | UNQ2058  | MYB       | MYB            | v-myb myeloblastosis viral oncogene homolog (avian)                                                            |
| 235144_at  | 16.406      | 0      | 0      | 1.957             | UNQ19471 | RASEF     | RASEF          | RAS and EF-hand domain containing                                                                              |
| 225912_at  | -9.259      | 0      | 0      | -1.617            | UNQ2116E | TP53INP1  | TP53INP1       | tumor protein p53 inducible nuclear protein 1                                                                  |
| 218807_at  | -9.498      | 0      | 0      | -1.125            | UNQ1425E | VAV3      | VAV3           | vav 3 guanine nucleotide exchange factor                                                                       |
| 202095_s_x | 10.425      | 0      | 0      | 1.59              | UNQ6162  | BIRC5     | BIRC5          | baculoviral IAP repeat-containing 5 (survivin)                                                                 |

Supplemental table 4: Ras pathway predictors

| Cell Line      | mcf10a_RAS MEK predictor |
|----------------|--------------------------|
| MDA-MB-134VI   | 1.561522258              |
| HDQ-P1         | 3.005412519              |
| DU4475         | 5.088272929              |
| MT-3           | 0.094212097              |
| HCC1806        | 6.057952552              |
| MDA-MB-435S    | 7.897471489              |
| HCC70          | 5.209717563              |
| HCC1954        | 7.271376772              |
| CAL-120        | 7.825616103              |
| MX1            | 1.526650039              |
| CAL-85-1       | 5.877978641              |
| SW527          | 3.000730351              |
| CAL-51         | 4.83582616               |
| MDA-MB-231     | 7.812897994              |
| HCC1143        | 9.828949712              |
| BT-20          | -0.715458478             |
| MDA-MB-175-VII | -5.916575386             |
| HS 578T        | -0.493018017             |
| MDA-MB-468     | 8.422287698              |
| HCC1395        | -1.454714578             |
| MFM-223        | 1.755087639              |
| AU565          | -0.684587495             |
| BT-474         | -0.432212789             |
| BT-483         | -3.779623789             |
| BT-549         | 3.470857318              |
| CAL-148        | -4.634639056             |
| CAMA-1         | 1.063519427              |
| EFM-19         | -0.931087696             |
| EFM-192A       | 0.989251324              |
| EVSA-T         | -2.805201836             |
| HCC1187        | 2.760688293              |
| HCC1419        | -5.284668636             |
| HCC1428        | -0.996595596             |
| HCC1500        | -0.632811063             |
| HCC1569        | 3.282208361              |
| HCC1937        | 4.819642478              |
| HCC2218        | -10.28517067             |
| HCC38          | 2.66314843               |
| JIM-T          | 3.152998211              |
| KPL-1          | -6.409216711             |
| KPL4           | -2.411538379             |
| MCF7           | -5.795687238             |
| MDA-MB-361     | -2.048195804             |
| MDA-MB-415     | 0.793425341              |
| MDA-MB-436     | 3.041703724              |
| MDA-MB-453     | -1.91388501              |
| SK-BR-3        | -4.747140587             |
| T-47D          | -1.580969544             |
| UACC-812       | -3.741796407             |
| UACC-893       | -2.44463976              |
| ZR-75-1        | -1.924760377             |
| ZR-75-30       | -2.646637775             |
